# Supplementary material for: Impact of SARS-CoV-2 envelope protein mutations on the pathogenicity of Omicron XBB
Source: PubMed Central journal article supplement (PMC10382526; doi:10.1038/s41421-023-00575-7), 2023-07-28
Supplement: 41421_2023_575_MOESM1_ESM.pdf [file 41421_2023_575_MOESM1_ESM.pdf]

1 **Supplementary figure and tables:**

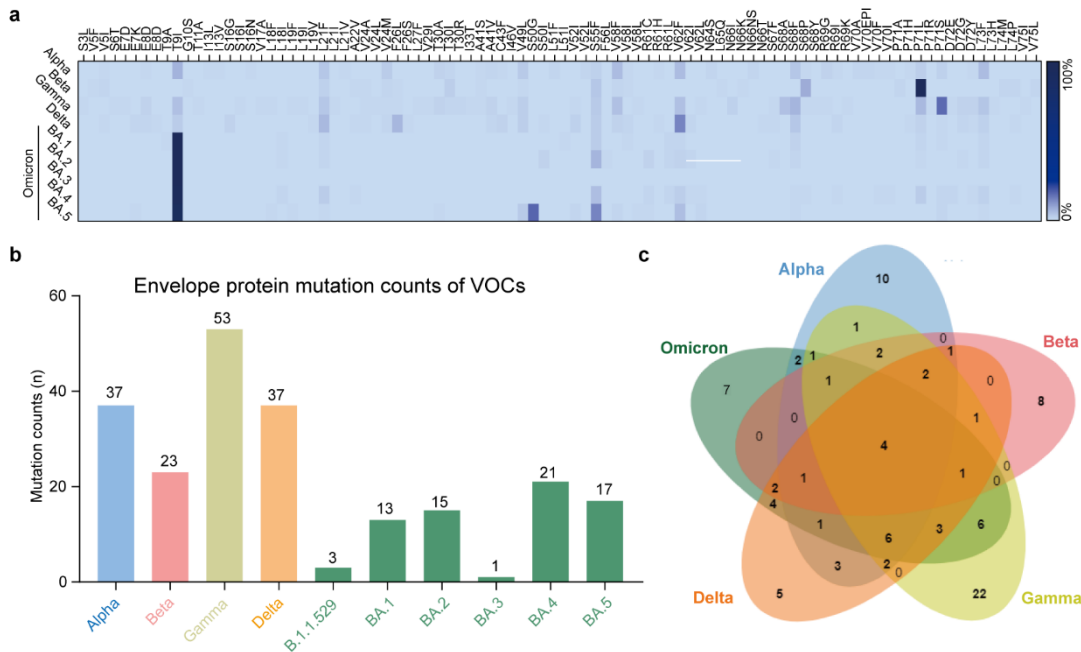

2

3 **Fig.S1 Statistics of 2-E mutations. a.** Heat map of 2-E mutations frequency in five VOCs.

4 **b.** The mutation counts of 2-E in each VOCs. **c.** Venn diagram of 2-E mutations in Omicron

5 compared with other VOCs.

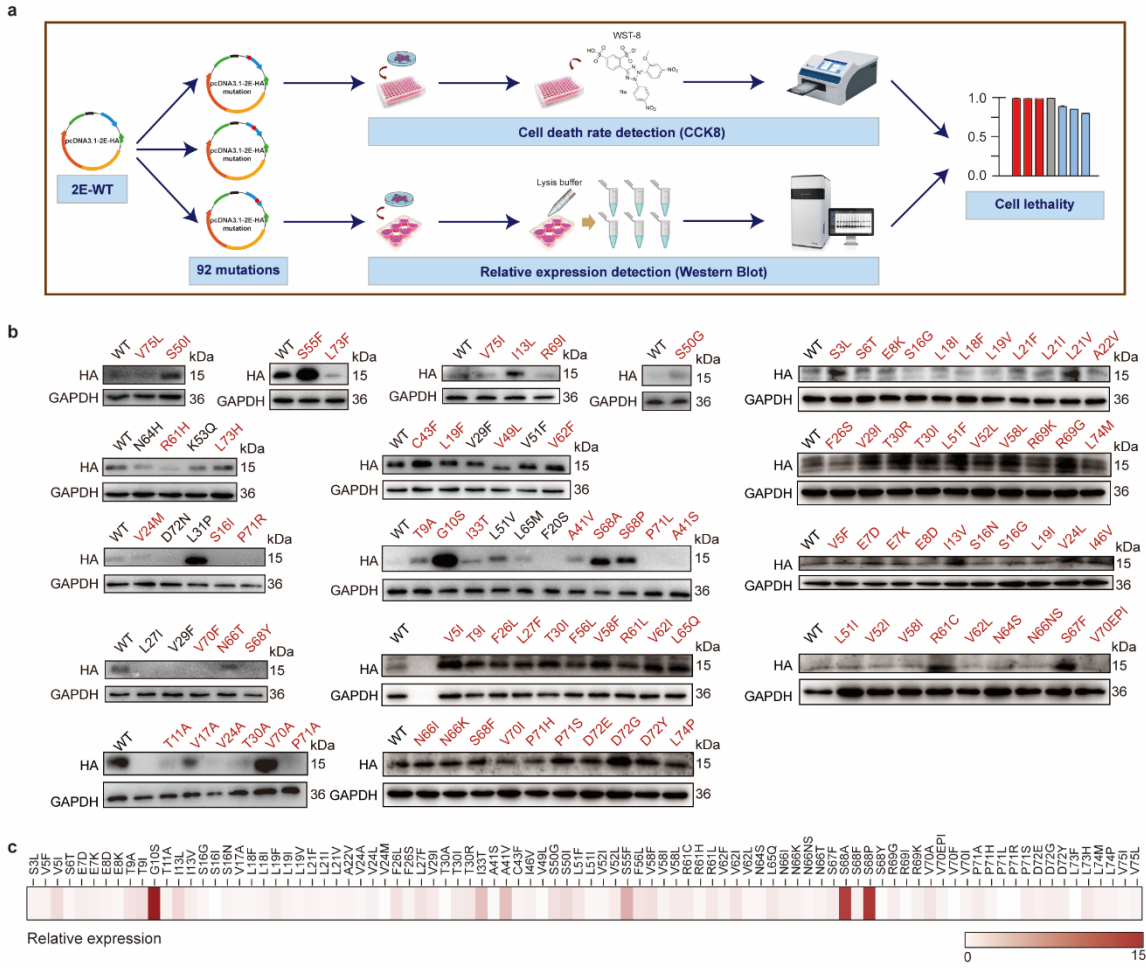

6

7 **Fig.S2 Cell lethality detection of 2-E mutations. a.** Schematic of cell lethality detection.

8 **b and c.** The protein expression level of 2-E mutations in Vero E6 cells after transfection.

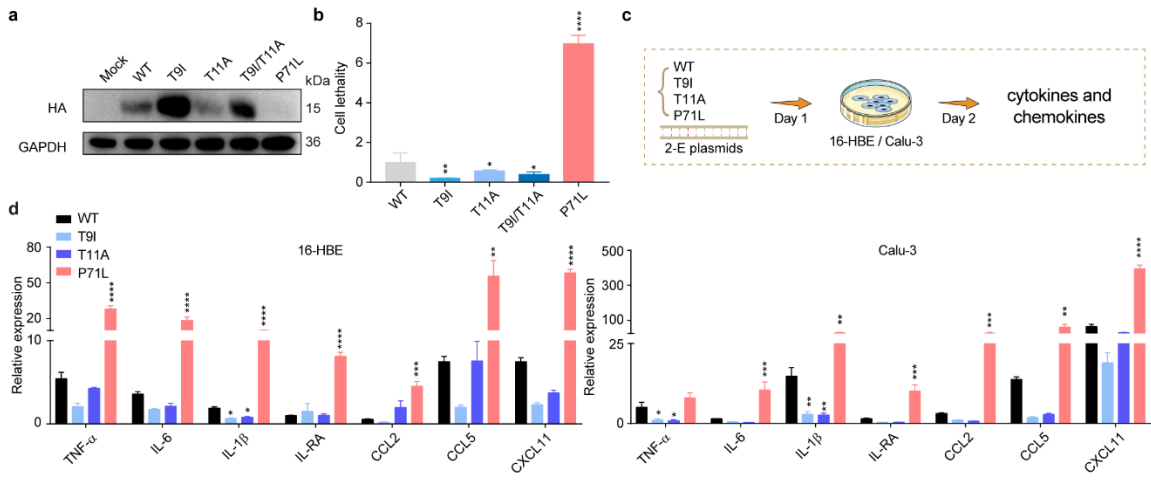

9

10 **Fig.S3 T9I and T11A weaken cell lethality and inflammation.**

11 **a**, Protein expression levels of WT ,T9I/T11A or P71L in Vero E6 cells after transfection.  
 12 **b**, The cell lethality for Vero E6 cells after transfection with plasmids as indicated. **c**,  
 13 Transfection of Calu-3 and 16HBE cells. **d**, Expression of cytokines and chemokines  
 14 following transfection of WT, T9I T11A and P71L plasmids, measuring mRNA expression  
 15 via qRT-PCR. All data are representative of three independent experiments. \* $p < 0.05$ ; \*\* $p$   
 16  $< 0.01$ ; \*\*\* $p < 0.001$ ; unpaired Student's t test. All error bars are SEM ( $n \geq 3$  ).

17

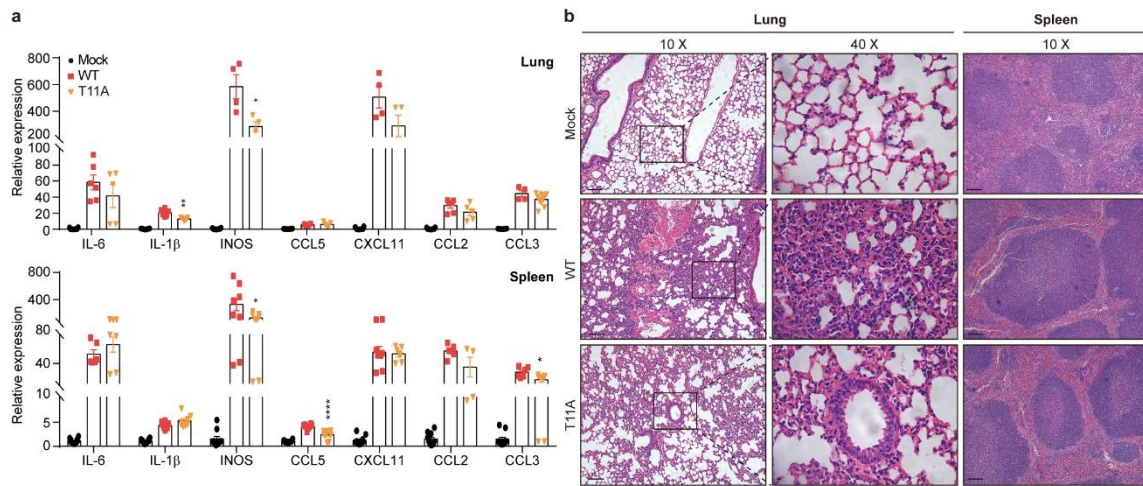

18

19 **Fig.S4 T11A cause less severe inflammation than wild type 2-E channel *in vivo*.**

20 **a**, qRT-PCR analysis of cytokine levels after 24 h treatment. **b**, Histopathology of lungs  
 21 and spleens from 2-E WT and T11A proteins treatment groups (bar, 100  $\mu$ m). \* $p < 0.05$ ;  
 22 \*\* $p < 0.01$ ; \*\*\* $p < 0.001$ ; unpaired Student's t test. All error bars are SEM ( $n \geq 3$ ).

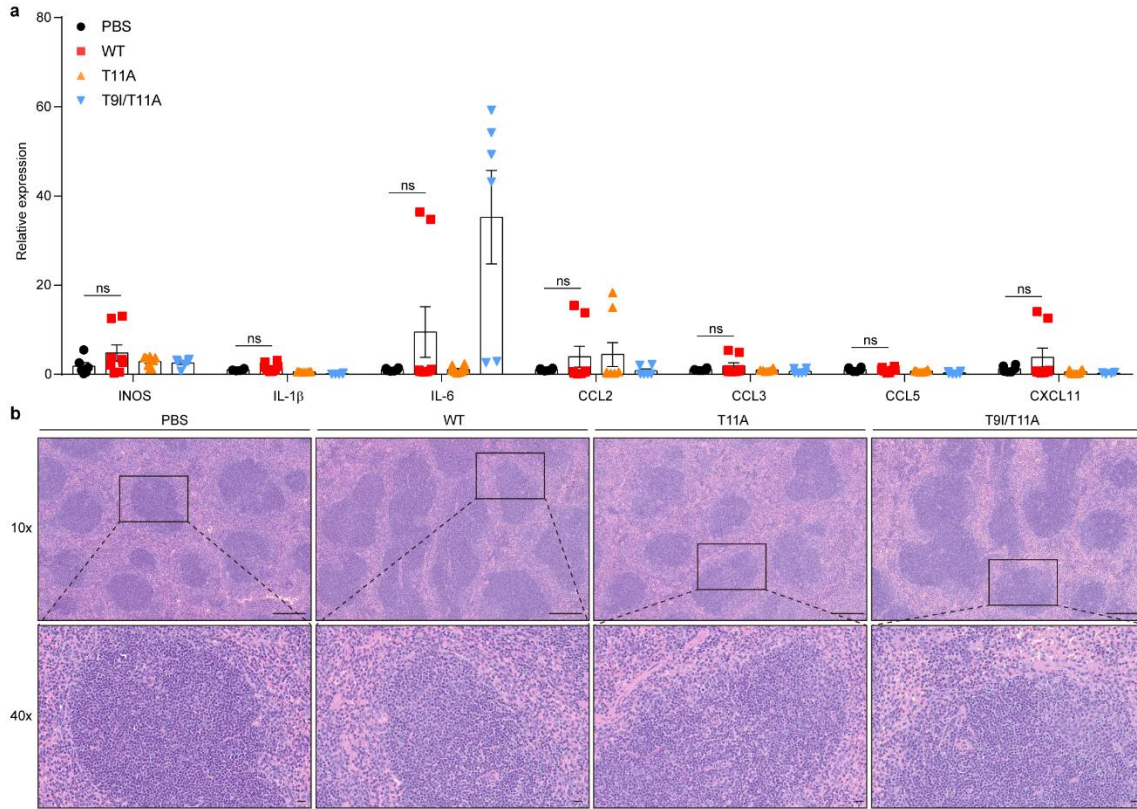

23

24 **Fig.S5 Intratracheal injection of 2-E did not cause severe inflammation in spleen.**

25 **a**, qRT-PCR analysis of cytokines and chemokines levels after 24 h treatment. \* $p < 0.05$ ;

26 \*\* $p < 0.001$ ; unpaired Student's t test. All error bars are SEM. **b**, Histopathology of spleens

27 from PBS, WT, T11A and T9I/T11A proteins treatment groups (bar, 10  $\mu$ m).

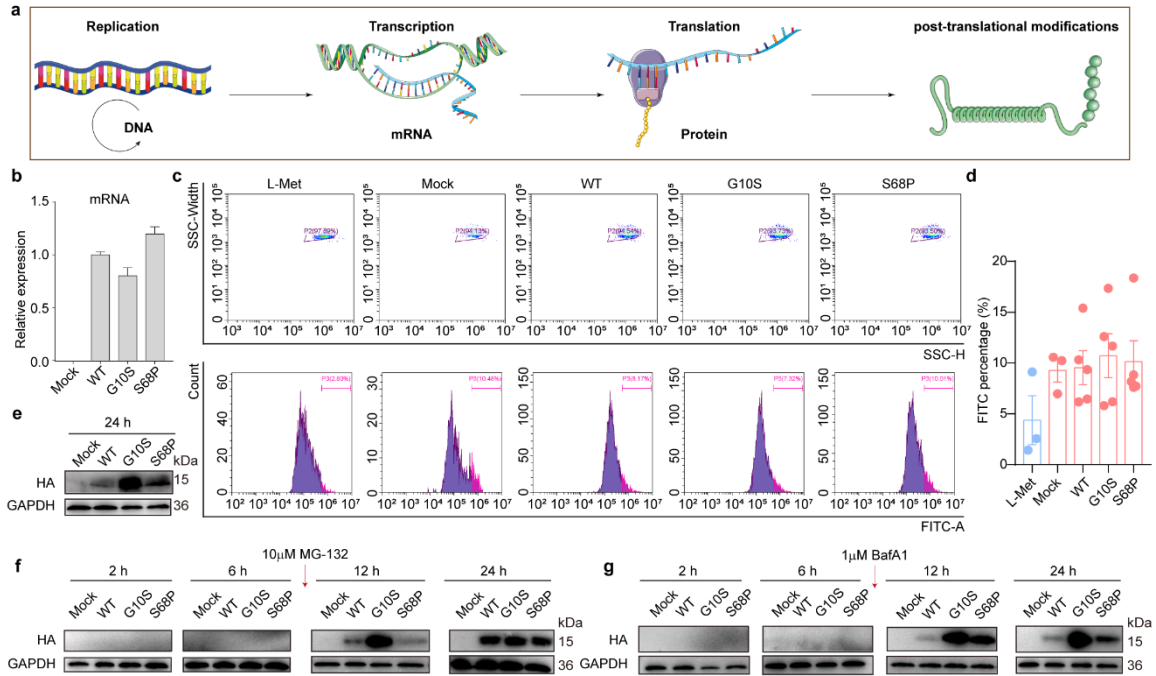

**Fig.S6 Ubiquitination and degradation of 2-E protein affect its expression level.**

**a**, Flow chart of the experiments. Potential mechanisms affecting 2-E protein expression level were explored at different levels. **b**, Vero E6 cells transfected with WT, G10S, and S68P. The RNA of cells was extracted after 24 hours and examined by qRT-PCR. The mRNA level of 2-E mutations as indicated. **c and d**, The overall translation efficiency detection of 2-E mutations as indicated. **e**, The protein expression level of 2-E mutations as indicated. **f-g**, The expression level of 2-E mutations at different time points under 10 µM MG132 (f) and 1 µM BafA1 treatment. \* $p < 0.05$ ; \*\* $p < 0.001$ ; unpaired Student's t test. All error bars are SEM.

28

29

30

31

32

33

34

35

36

37

38

39

40

41

**Supplementary Table S1** 2-E mutations with frequency  $\geq 0.01\%$  in five VOC

|             | <b>Omicron</b> |             |              |              |             |             |             |             |             |
|-------------|----------------|-------------|--------------|--------------|-------------|-------------|-------------|-------------|-------------|
|             | <b>Alpha</b>   | <b>Beta</b> | <b>Gamma</b> | <b>Delta</b> | <b>BA.1</b> | <b>BA.2</b> | <b>BA.3</b> | <b>BA.4</b> | <b>BA.5</b> |
| <b>S3L</b>  | 0.00%          | 0.00%       | 0.01%        | 0.00%        | 0.00%       | 0.00%       | 0.00%       | 0.00%       | 0.00%       |
| <b>V5F</b>  | 0.00%          | 0.01%       | 0.00%        | 0.00%        | 0.00%       | 0.00%       | 0.00%       | 0.00%       | 0.00%       |
| <b>V5I</b>  | 0.01%          | 0.02%       | 0.00%        | 0.01%        | 0.00%       | 0.00%       | 0.00%       | 0.00%       | 0.00%       |
| <b>S6T</b>  | 0.00%          | 0.00%       | 0.01%        | 0.00%        | 0.00%       | 0.00%       | 0.00%       | 0.00%       | 0.00%       |
| <b>E7D</b>  | 0.00%          | 0.00%       | 0.01%        | 0.00%        | 0.00%       | 0.00%       | 0.00%       | 0.00%       | 0.00%       |
| <b>E7K</b>  | 0.00%          | 0.00%       | 0.00%        | 0.02%        | 0.00%       | 0.00%       | 0.00%       | 0.00%       | 0.00%       |
| <b>E8D</b>  | 0.01%          | 0.00%       | 0.03%        | 0.02%        | 0.00%       | 0.00%       | 0.00%       | 0.00%       | 0.00%       |
| <b>E8K</b>  | 0.00%          | 0.00%       | 0.00%        | 0.01%        | 0.00%       | 0.00%       | 0.00%       | 0.00%       | 0.00%       |
| <b>T9A</b>  | 0.00%          | 0.00%       | 0.00%        | 0.00%        | 0.01%       | 0.00%       | 0.00%       | 0.00%       | 0.00%       |
| <b>T9I</b>  | 0.17%          | 0.00%       | 0.11%        | 0.06%        | 99.70%      | 96.39%      | 99.50%      | 93.47%      | 83.07%      |
| <b>G10S</b> | 0.00%          | 0.01%       | 0.00%        | 0.00%        | 0.00%       | 0.00%       | 0.00%       | 0.00%       | 0.00%       |
| <b>T11A</b> | 0.00%          | 0.00%       | 0.01%        | 0.00%        | 0.00%       | 0.00%       | 0.00%       | 0.00%       | 0.00%       |
| <b>I13L</b> | 0.01%          | 0.00%       | 0.00%        | 0.00%        | 0.00%       | 0.00%       | 0.00%       | 0.00%       | 0.00%       |
| <b>I13V</b> | 0.01%          | 0.00%       | 0.00%        | 0.00%        | 0.00%       | 0.00%       | 0.00%       | 0.00%       | 0.00%       |
| <b>S16G</b> | 0.00%          | 0.00%       | 0.00%        | 0.03%        | 0.00%       | 0.00%       | 0.00%       | 0.00%       | 0.00%       |
| <b>S16I</b> | 0.00%          | 0.00%       | 0.01%        | 0.00%        | 0.00%       | 0.00%       | 0.00%       | 0.00%       | 0.00%       |
| <b>S16N</b> | 0.01%          | 0.00%       | 0.00%        | 0.00%        | 0.00%       | 0.00%       | 0.00%       | 0.00%       | 0.00%       |
| <b>V17A</b> | 0.00%          | 0.00%       | 0.01%        | 0.00%        | 0.00%       | 0.00%       | 0.00%       | 0.00%       | 0.00%       |
| <b>L18F</b> | 0.00%          | 0.00%       | 0.01%        | 0.00%        | 0.00%       | 0.00%       | 0.00%       | 0.00%       | 0.00%       |
| <b>L18I</b> | 0.00%          | 0.00%       | 0.00%        | 0.00%        | 0.01%       | 0.01%       | 0.00%       | 0.00%       | 0.00%       |
| <b>L19F</b> | 0.00%          | 0.00%       | 0.01%        | 0.00%        | 0.00%       | 0.00%       | 0.00%       | 0.00%       | 0.00%       |
| <b>L19I</b> | 0.00%          | 0.00%       | 0.01%        | 0.00%        | 0.00%       | 0.00%       | 0.00%       | 0.00%       | 0.00%       |
| <b>L19V</b> | 0.00%          | 0.00%       | 0.00%        | 0.01%        | 0.00%       | 0.00%       | 0.00%       | 0.00%       | 0.00%       |
| <b>L21F</b> | 0.08%          | 0.04%       | 0.08%        | 0.14%        | 0.02%       | 0.02%       | 0.00%       | 0.00%       | 0.00%       |

---

**Omicron**

---

|             | <b>Alpha</b> | <b>Beta</b> | <b>Gamma</b> | <b>Delta</b> | <b>BA.1</b> | <b>BA.2</b> | <b>BA.3</b> | <b>BA.4</b> | <b>BA.5</b> |
|-------------|--------------|-------------|--------------|--------------|-------------|-------------|-------------|-------------|-------------|
| <b>L21I</b> | 0.00%        | 0.00%       | 0.01%        | 0.00%        | 0.00%       | 0.00%       | 0.00%       | 0.00%       | 0.00%       |
| <b>L21V</b> | 0.01%        | 0.00%       | 0.00%        | 0.00%        | 0.00%       | 0.00%       | 0.00%       | 0.00%       | 0.00%       |
| <b>A22V</b> | 0.00%        | 0.01%       | 0.00%        | 0.01%        | 0.00%       | 0.00%       | 0.00%       | 0.00%       | 0.00%       |
| <b>V24A</b> | 0.00%        | 0.01%       | 0.01%        | 0.01%        | 0.00%       | 0.00%       | 0.00%       | 0.00%       | 0.00%       |
| <b>V24L</b> | 0.00%        | 0.00%       | 0.01%        | 0.00%        | 0.00%       | 0.00%       | 0.00%       | 0.00%       | 0.00%       |
| <b>V24M</b> | 0.06%        | 0.02%       | 0.01%        | 0.02%        | 0.00%       | 0.00%       | 0.00%       | 0.00%       | 0.00%       |
| <b>F26L</b> | 0.00%        | 0.01%       | 0.01%        | 0.15%        | 0.00%       | 0.00%       | 0.00%       | 0.00%       | 0.00%       |
| <b>F26S</b> | 0.00%        | 0.00%       | 0.00%        | 0.01%        | 0.00%       | 0.00%       | 0.00%       | 0.00%       | 0.00%       |
| <b>L27F</b> | 0.00%        | 0.00%       | 0.01%        | 0.00%        | 0.00%       | 0.00%       | 0.00%       | 0.00%       | 0.00%       |
| <b>V29I</b> | 0.00%        | 0.00%       | 0.01%        | 0.00%        | 0.00%       | 0.00%       | 0.00%       | 0.00%       | 0.00%       |
| <b>T30A</b> | 0.03%        | 0.00%       | 0.03%        | 0.00%        | 0.00%       | 0.00%       | 0.00%       | 0.00%       | 0.00%       |
| <b>T30I</b> | 0.02%        | 0.05%       | 0.02%        | 0.00%        | 0.00%       | 0.00%       | 0.00%       | 0.00%       | 0.00%       |
| <b>T30R</b> | 0.00%        | 0.00%       | 0.02%        | 0.00%        | 0.00%       | 0.00%       | 0.00%       | 0.00%       | 0.00%       |
| <b>I33T</b> | 0.00%        | 0.00%       | 0.01%        | 0.00%        | 0.00%       | 0.00%       | 0.00%       | 0.00%       | 0.00%       |
| <b>A41S</b> | 0.01%        | 0.01%       | 0.01%        | 0.00%        | 0.00%       | 0.00%       | 0.00%       | 0.00%       | 0.00%       |
| <b>A41V</b> | 0.02%        | 0.00%       | 0.03%        | 0.02%        | 0.00%       | 0.00%       | 0.00%       | 0.00%       | 0.00%       |
| <b>C43F</b> | 0.01%        | 0.00%       | 0.00%        | 0.03%        | 0.00%       | 0.00%       | 0.00%       | 0.00%       | 0.00%       |
| <b>I46V</b> | 0.00%        | 0.00%       | 0.01%        | 0.00%        | 0.00%       | 0.00%       | 0.00%       | 0.00%       | 0.00%       |
| <b>V49L</b> | 0.07%        | 0.01%       | 0.05%        | 0.05%        | 0.00%       | 0.00%       | 0.00%       | 0.00%       | 0.00%       |
| <b>S50G</b> | 0.00%        | 0.00%       | 0.00%        | 0.00%        | 0.00%       | 0.00%       | 0.00%       | 0.00%       | 0.51%       |
| <b>S50I</b> | 0.00%        | 0.00%       | 0.00%        | 0.01%        | 0.00%       | 0.03%       | 0.00%       | 0.00%       | 0.00%       |
| <b>L51F</b> | 0.02%        | 0.00%       | 0.00%        | 0.00%        | 0.00%       | 0.00%       | 0.00%       | 0.00%       | 0.00%       |
| <b>L51I</b> | 0.00%        | 0.00%       | 0.00%        | 0.00%        | 0.01%       | 0.00%       | 0.00%       | 0.00%       | 0.00%       |
| <b>V52I</b> | 0.00%        | 0.00%       | 0.01%        | 0.04%        | 0.00%       | 0.00%       | 0.00%       | 0.00%       | 0.00%       |
| <b>V52L</b> | 0.02%        | 0.00%       | 0.00%        | 0.00%        | 0.00%       | 0.00%       | 0.00%       | 0.00%       | 0.00%       |
| <b>S55F</b> | 0.04%        | 0.08%       | 0.07%        | 0.06%        | 0.25%       | 0.25%       | 0.10%       | 0.15%       | 0.21%       |





|             | <b>Omicron</b> |             |              |              |             |             |             |             |             |
|-------------|----------------|-------------|--------------|--------------|-------------|-------------|-------------|-------------|-------------|
|             | <b>Alpha</b>   | <b>Beta</b> | <b>Gamma</b> | <b>Delta</b> | <b>BA.1</b> | <b>BA.2</b> | <b>BA.3</b> | <b>BA.4</b> | <b>BA.5</b> |
| <b>V70F</b> | 0.01%          | 0.00%       | 0.00%        | 0.00%        | 0.00%       | 0.00%       | 0.00%       | 0.00%       | 0.00%       |
| <b>V70I</b> | 0.01%          | 0.00%       | 0.00%        | 0.00%        | 0.00%       | 0.00%       | 0.00%       | 0.00%       | 0.00%       |
| <b>P71A</b> | 0.00%          | 0.02%       | 0.00%        | 0.00%        | 0.00%       | 0.00%       | 0.00%       | 0.00%       | 0.00%       |
| <b>P71H</b> | 0.01%          | 0.00%       | 0.00%        | 0.01%        | 0.00%       | 0.00%       | 0.00%       | 0.00%       | 0.00%       |
| <b>P71L</b> | 0.05%          | 99.12%      | 0.14%        | 0.03%        | 0.02%       | 0.01%       | 0.00%       | 0.06%       | 0.09%       |
| <b>P71R</b> | 0.00%          | 0.00%       | 0.01%        | 0.00%        | 0.00%       | 0.00%       | 0.00%       | 0.00%       | 0.00%       |
| <b>P71S</b> | 0.04%          | 0.00%       | 0.49%        | 0.01%        | 0.01%       | 0.01%       | 0.00%       | 0.01%       | 0.01%       |
| <b>D72E</b> | 0.00%          | 0.00%       | 0.01%        | 0.00%        | 0.00%       | 0.00%       | 0.00%       | 0.00%       | 0.00%       |
| <b>D72G</b> | 0.00%          | 0.00%       | 0.03%        | 0.02%        | 0.00%       | 0.01%       | 0.00%       | 0.00%       | 0.00%       |
| <b>D72Y</b> | 0.01%          | 0.00%       | 0.03%        | 0.01%        | 0.00%       | 0.00%       | 0.00%       | 0.00%       | 0.00%       |
| <b>L73F</b> | 0.13%          | 0.00%       | 0.09%        | 0.04%        | 0.02%       | 0.02%       | 0.00%       | 0.05%       | 0.01%       |
| <b>L73H</b> | 0.00%          | 0.00%       | 0.01%        | 0.00%        | 0.00%       | 0.00%       | 0.00%       | 0.00%       | 0.00%       |
| <b>L74M</b> | 0.00%          | 0.02%       | 0.00%        | 0.00%        | 0.00%       | 0.00%       | 0.00%       | 0.00%       | 0.00%       |
| <b>L74P</b> | 0.00%          | 0.02%       | 0.00%        | 0.01%        | 0.00%       | 0.00%       | 0.00%       | 0.00%       | 0.00%       |
| <b>V75I</b> | 0.00%          | 0.00%       | 0.01%        | 0.00%        | 0.00%       | 0.00%       | 0.00%       | 0.00%       | 0.00%       |
| <b>V75L</b> | 0.00%          | 0.02%       | 0.00%        | 0.00%        | 0.00%       | 0.00%       | 0.00%       | 0.00%       | 0.00%       |

43

44

**Supplementary Table S2** 2-E mutations with frequency  $\geq 0.01\%$  in newly emergent

45

Omicron sub-variants

|            | <b>BA.5.2</b> | <b>BF.5</b> | <b>BF.7</b> | <b>BQ.1</b> | <b>BQ.1.1</b> | <b>XBB</b> |
|------------|---------------|-------------|-------------|-------------|---------------|------------|
| <b>V5I</b> | 0.01%         | 0.01%       | 0.11%       | 0.01%       | 0.01%         | 0.00%      |
| <b>E7K</b> | 0.01%         | 0.01%       | 0.00%       | 0.00%       | 0.00%         | 0.00%      |
| <b>E8D</b> | 0.00%         | 0.00%       | 0.00%       | 0.00%       | 0.01%         | 0.00%      |
| <b>T9A</b> | 0.01%         | 0.01%       | 0.00%       | 0.01%       | 0.00%         | 0.00%      |
| <b>T9I</b> | 91.68%        | 96.76%      | 91.44%      | 93.13%      | 91.19%        | 91.39%     |

---

|             |       |       |       |       |       |        |
|-------------|-------|-------|-------|-------|-------|--------|
| <b>T11A</b> | 0.00% | 0.00% | 0.00% | 0.00% | 0.01% | 90.59% |
| <b>S16G</b> | 0.00% | 0.00% | 0.00% | 0.00% | 0.01% | 0.00%  |
| <b>L18I</b> | 0.04% | 0.01% | 0.05% | 0.00% | 0.00% | 0.00%  |
| <b>L21F</b> | 0.03% | 0.01% | 0.03% | 0.06% | 0.02% | 0.00%  |
| <b>L21I</b> | 0.00% | 0.00% | 0.03% | 0.00% | 0.00% | 0.00%  |
| <b>A22V</b> | 0.00% | 0.00% | 0.00% | 0.01% | 0.00% | 0.00%  |
| <b>V24L</b> | 0.01% | 0.00% | 0.00% | 0.00% | 0.00% | 0.00%  |
| <b>V24M</b> | 0.01% | 0.00% | 0.00% | 0.02% | 0.01% | 0.00%  |
| <b>F26L</b> | 0.01% | 0.00% | 0.00% | 0.01% | 0.00% | 0.00%  |
| <b>T30I</b> | 0.00% | 0.00% | 0.00% | 0.00% | 0.01% | 0.00%  |
| <b>A41V</b> | 0.01% | 0.00% | 0.00% | 0.01% | 0.00% | 0.00%  |
| <b>C43F</b> | 0.00% | 0.00% | 0.00% | 0.01% | 0.00% | 0.00%  |
| <b>V49L</b> | 0.01% | 0.01% | 0.00% | 0.00% | 0.00% | 0.00%  |
| <b>S50G</b> | 0.03% | 0.00% | 0.01% | 0.02% | 0.00% | 0.00%  |
| <b>S50I</b> | 0.01% | 0.05% | 0.00% | 0.00% | 0.00% | 0.00%  |
| <b>L51F</b> | 0.00% | 0.00% | 0.00% | 0.00% | 0.00% | 0.00%  |
| <b>L51I</b> | 0.01% | 0.01% | 0.00% | 0.00% | 0.02% | 0.00%  |
| <b>S55F</b> | 0.80% | 0.15% | 0.16% | 0.79% | 0.05% | 0.00%  |
| <b>V58F</b> | 0.01% | 0.00% | 0.00% | 0.00% | 0.00% | 0.00%  |
| <b>V58I</b> | 0.01% | 0.03% | 0.00% | 0.01% | 0.01% | 0.00%  |
| <b>V58L</b> | 0.02% | 0.00% | 0.00% | 0.00% | 0.02% | 0.00%  |
| <b>R61C</b> | 0.01% | 0.00% | 0.00% | 0.00% | 0.00% | 0.00%  |
| <b>R61L</b> | 0.01% | 0.00% | 0.19% | 0.00% | 0.00% | 0.00%  |
| <b>V62F</b> | 0.27% | 0.07% | 0.21% | 0.01% | 0.06% | 0.00%  |
| <b>V62I</b> | 0.01% | 0.04% | 0.00% | 0.00% | 0.00% | 0.00%  |
| <b>N66K</b> | 0.00% | 0.01% | 0.01% | 0.00% | 0.00% | 0.00%  |
| <b>S68F</b> | 0.04% | 0.06% | 0.00% | 0.02% | 0.00% | 0.00%  |
| <b>S68P</b> | 0.00% | 0.02% | 0.02% | 0.01% | 0.00% | 0.00%  |

---

|             |       |       |       |       |       |       |
|-------------|-------|-------|-------|-------|-------|-------|
| <b>V70A</b> | 0.00% | 0.00% | 0.01% | 0.00% | 0.00% | 0.00% |
| <b>V70I</b> | 0.00% | 0.00% | 0.00% | 0.00% | 0.01% | 0.00% |
| <b>P71H</b> | 0.01% | 0.00% | 0.01% | 0.00% | 0.00% | 0.00% |
| <b>P71L</b> | 0.02% | 0.03% | 0.05% | 0.02% | 0.04% | 0.00% |
| <b>P71S</b> | 0.09% | 0.00% | 0.00% | 0.07% | 0.11% | 0.00% |
| <b>D72G</b> | 0.01% | 0.13% | 0.01% | 0.00% | 0.01% | 0.00% |
| <b>D72H</b> | 0.00% | 0.00% | 0.00% | 0.00% | 0.00% | 0.18% |
| <b>L73F</b> | 0.01% | 0.02% | 0.05% | 0.01% | 0.01% | 0.09% |

---

46

47

48 **Methods**

49 **Mutation frequency statistics**

50 The frequency of 2-E spontaneous mutations was collected from National Genomics Data  
51 Center (NGDC). All mutations with frequency  $\geq 0.01\%$  were selected to further analysis.

52 The  $\Delta$ frequency was defined as difference of the maximum frequency value of early VOCs  
53 2-E mutations and that of Omicron sub-variants.

54

55 **Plasmids and mutagenesis**

56 Wild-type SARS-CoV-2-E sequences were synthesized in pcDNA3.1 with a HA tag by the  
57 Beijing Genomics Institute (BGI, China). Point mutations were generated using sited-  
58 directed mutagenesis, and all mutations were confirmed by sequencing (BGI, China).

59

60 **Cell culture**

61 Vero E6 cells were purchased from National Collection of Authenticate Cell Cultures  
62 (China). Vero E6 cells were grown in 90% DMEM basal medium (Gibco, NY, USA)  
63 supplemented with 10% fetal bovine serum (Gibco, NY, USA) and 100 units/mL  
64 penicillin/streptomycin (Gibco, NY, USA). Cells were grown at 37 °C, 5% CO<sub>2</sub> incubator,  
65 and passaged approximately every 2 days when on fluency up to 80%–90%. Vero-E6  
66 cells were seeded on the 6-well cell culture plates for western blot and 96-well culture  
67 plates for CCK-8 assay.

68

69 **Western blot**

70 Cells were lysed by lysis buffer (20118ES60, Yeasen, China). Then the proteins were  
71 collected and quantified by BCA protein assay kit (Thermofisher, USA). Proteins were  
72 resolved in 12% SDS-PAGE, transferred to PVDF membranes (GE, USA), and incubated  
73 with primary antibodies against HA-Tag (proteintech, USA), GAPDH (Yeasen, China).  
74 Second antibodies are peroxidase-Conjugated Goat Anti-Rabbit IgG (H+L) (33101ES60,  
75 Yeasen, China) and Peroxidase AffiniPure Goat Anti-Mouse IgG (H+L) (33201ES60,  
76 Yeasen, China). Then the relative expressions of 2-E mutations were analyzed with ImageJ.

77

### 78 **Cell death rate assay**

79 Vero E6 cells were transfected with 400 ng/ well 2-E plasmids or 2-E mutations using  
80 Lipofectamine 3000 Transfection Reagent (L3000015, Thermo Fisher, MA, USA). The  
81 control group was Vero E6 cells transfected with 400 ng/ well pcDNA3.1 vector plasmids  
82 alone. After 24 h, we tested cell viability by CCK-8 kit (40203ES60, Yeasen, China)  
83 according to our previous work. Absorbance analysis were performed with Thermo  
84 Scientific Microplate Reader at 450 nm according to the manufacturer's instructions  
85 (Thermo Fisher, MA, USA). Normalized cell death rate =  $(A_{\text{blank}} - A_{\text{mutation}})/(A_{\text{blank}} - A_{\text{model}})$ .

86

### 87 **Animal model**

88 To evaluate the pathogenicity of 2-E mutations *in vivo*, 2-E mutation proteins was  
89 conducted through intratracheal injection (2.5 mg/kg body weight) and tail vein injection  
90 (25 mg/kg body weight) in 8-week-old mice to establish mice model. Male C57BL/6 mice  
91 were obtained from Shanghai SLAC Laboratory Animal Co., Ltd. All animal procedures  
92 were performed in accordance with the National Institutes of Health Guide for the Care

93 and Use of Laboratory Animals, under protocols approved and strictly followed by the  
94 Institutional Animal Care and Use Committees (IACUC).

95

## 96 **Histology**

97 Tissues from 2-E WT or T11A treated mice were fixed in 4% PFA for at least 7 days, and  
98 then were paraffin embedded. The paraffin samples were cut into 3- $\mu$ m sections following  
99 the standard procedure. The sections were stained with H&E, and examined by Leica TCS-  
100 SP8 STED system (Leica Microsystems, DE).

101

## 102 **Viral release assay**

103 SARS-CoV-2 (nCoV-2019BetaCoV/Wuhan/WIV04/2019) was preserved at Wuhan  
104 Institute of Virology, Chinese Academy of Sciences (CAS). Its associated operations were  
105 performed in a biosafety level 3 (BSL-3) facility. For viral release assay, Vero E6 cells  
106 seeded in 48-well plate with 50,000 cells per well overnight were transfected with 2-E WT  
107 or mutations at day 1, than infected with SARS-CoV-2 (MOI=0.01) at day 2. At day 3, viral  
108 RNA was extracted from cell supernatants with Mini BEST Viral RNA/DNA Extraction  
109 Kit (Takara, Japan) according to the instructions, then reverse transcribed with Prime  
110 Script<sup>TM</sup> RT reagent Kit with gDNA Eraser (Takara, Japan). Viral genome copies were  
111 quantified with Takara TB Green<sup>®</sup> Premix Ex Taq<sup>TM</sup> II (Takara, Japan) by a standard curve  
112 method on ABI 7500 using a pair of primers targeting S gene. The forward primer: 5'-  
113 CAATGGTTTAAACAGGCACAGG -3', the reverse primer: 5'-  
114 CTCAAGTGTCTGTGGATCACG-3'.

115

116 **qRT-PCR Analysis**

117 Total RNAs were extracted from cells or tissues using Trizol (Invitrogen, USA) and all  
 118 total Nucleic Acid Isolation Kit (Ambion Inc., USA), following the manufacturer's  
 119 instruction. The experiment was performed using SYBR Green Master Mix (11184ES03,  
 120 Yeasen, China) to quantify the mean values of delta Ct and SEM ( $n \geq 3$ ). The primers used  
 121 for quantification were listed in Supplementary information, Supplementary Table S3.

122 **Supplementary Table S3: List of Quantitative Real-time PCR (qRT-PCR) primers.**

| Primer Name   | FWD sequence            | REV sequence           |
|---------------|-------------------------|------------------------|
| CCL2          | AGGTCCTGTCATGCTTCTG     | TCTGGACCCATTCTTCTTG    |
| CCL3          | ATGAAGGTCTCCACCACTGC    | CCCAGGTCTCTTTGGAGTCA   |
| CCL5          | CCCTCACCATCATCCTCACT    | CCTTCGAGTGACAAACACGA   |
| IL-6          | AGTTGCCTTCTTGGGACTGA    | TCCACGATTTCCCAGAGAAC   |
| IL-1RA        | CCAGCTCATTGCTGGGTACT    | TTCTCAGAGCGGATGAAGGT   |
| IL-1 $\beta$  | GAAGTTGACGGACCCCAAAA    | CCACAGCCACAATGAGTGATAC |
| CXCL9         | GAACGGAGATCAAACCTGCC    | CGACGACTTTGGGGTGTTTT   |
| INOS          | GTTCTCAGGCCAACAATACAAGA | GTGGACGGGTCGATGTCAC    |
| TNF- $\alpha$ | TCGTAGCAAACCACCAAGTG    | GGAGTAGACAAGGTACAACCCA |
| GAPDH         | AACTTTGGCATTGTGGAAGG    | ACACATTGGGGGTAGGAACA   |

123

124 **Protein synthesis assay**

125 Vero-E6 cells were transfected with 2-E WT, G10S, S68P or mock. After 24 hours, cells  
 126 were labeled by 1 mM AHA (C10102, Thermofisher, USA) or methionine (HY-  
 127 N0326, MCE, USA) and treated according to the protocol<sup>1</sup>, Alexa Fluor488 alkyne was

128 bought from Thermofisher (A10267, USA). Dxflex (Beckman Coulter, USA) was used to  
129 monitoring vero-E6 cells global protein synthesis after transfection.

130

131

132

133 **Reference**

134 1 Imami, K. & Yasuda, T. Measuring Protein Synthesis during Cell Cycle by  
135 Azidohomoalanine (AHA) Labeling and Flow Cytometric Analysis. *Bio Protoc* **9**,  
136 e3215, doi:10.21769/BioProtoc.3215 (2019).

137
